# Supplementary material for: Direct administration of the non-competitive interleukin-1 receptor antagonist rytvela transiently reduced intrauterine inflammation in an extremely preterm sheep model of chorioamnionitis
Source: PubMed Central journal article supplement (PMC8462743; doi:10.1371/journal.pone.0257847), 2021-09-24

GFAP

Total Protein

Target band

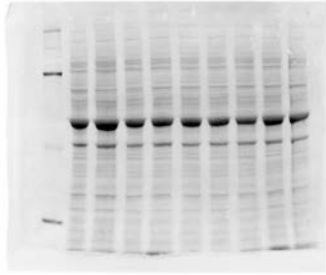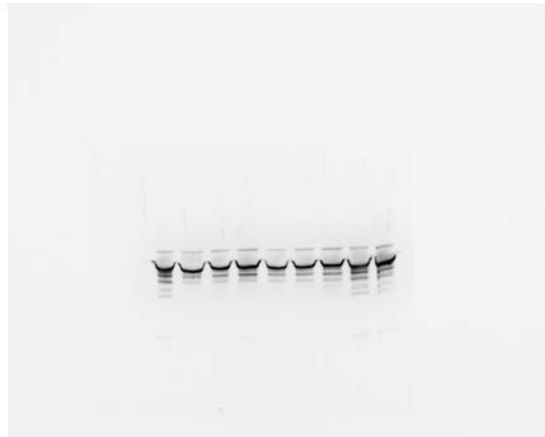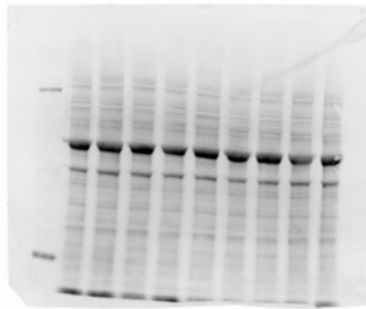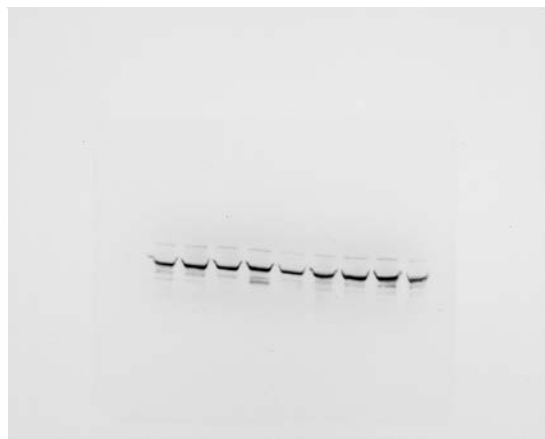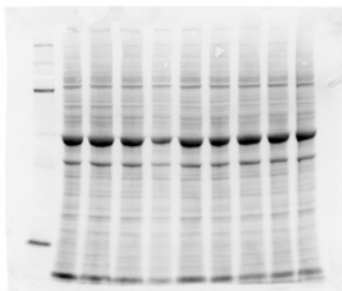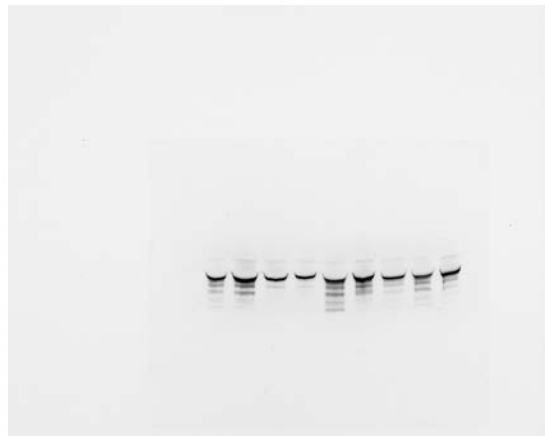

IBA-1

Total Protein

Target band

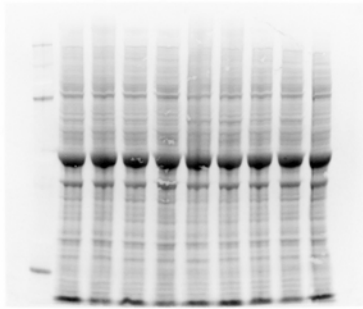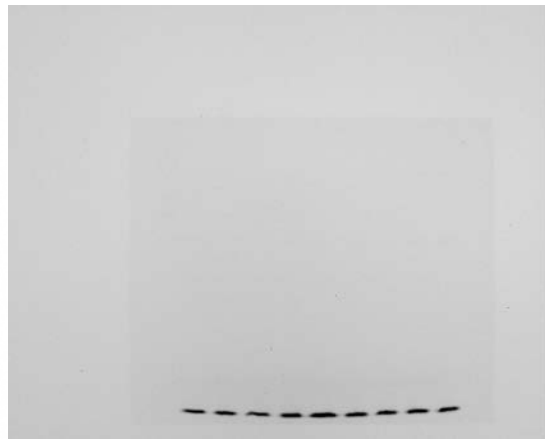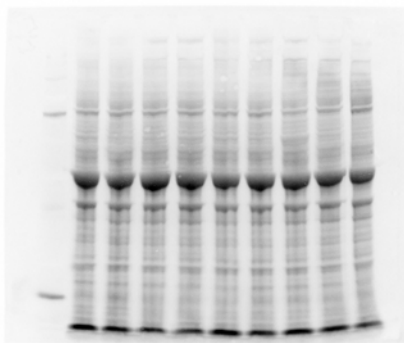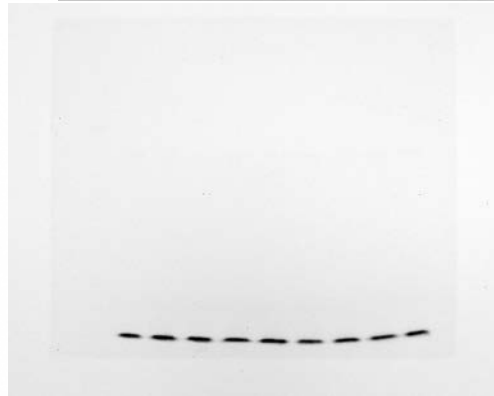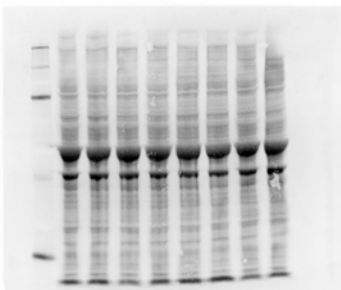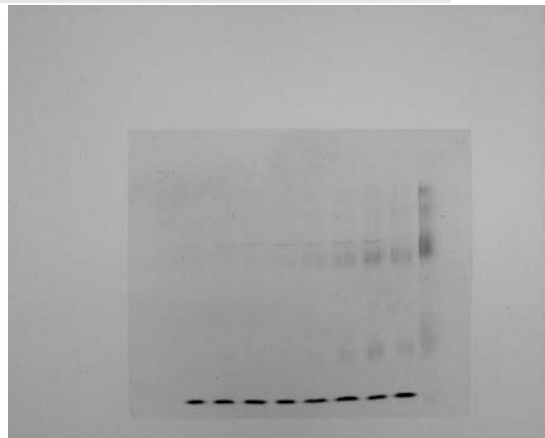

Olig-2 Total Protein

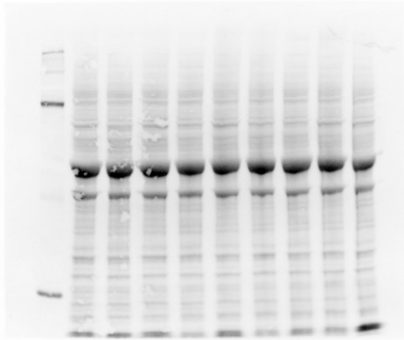

Target band

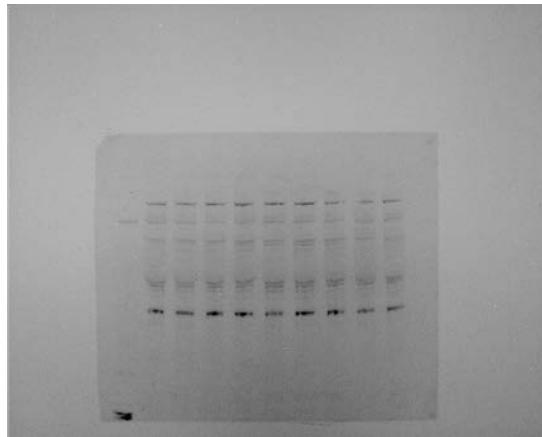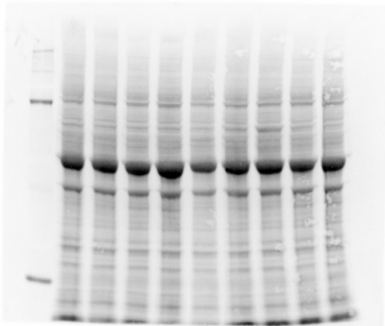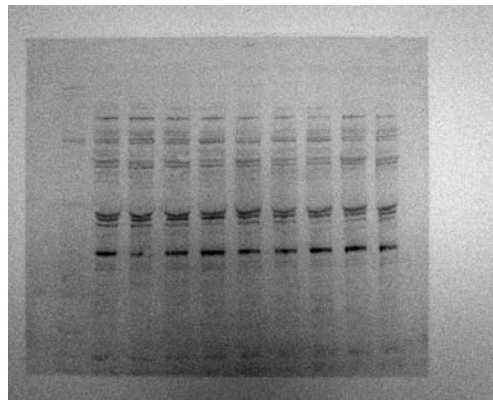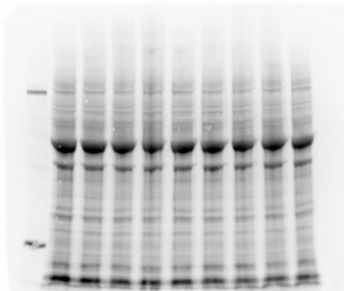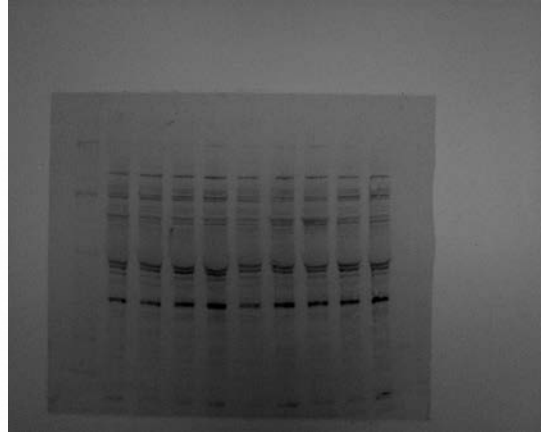

NeuN

Total Protein

Target band

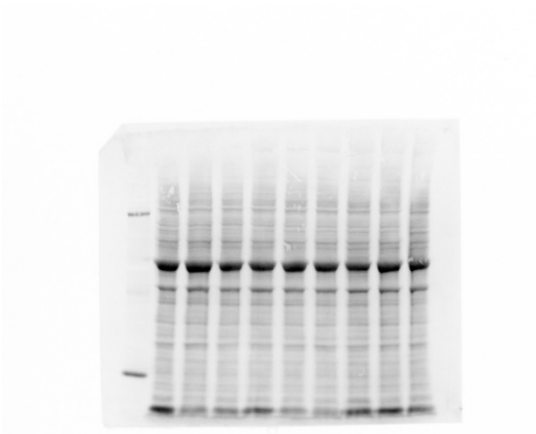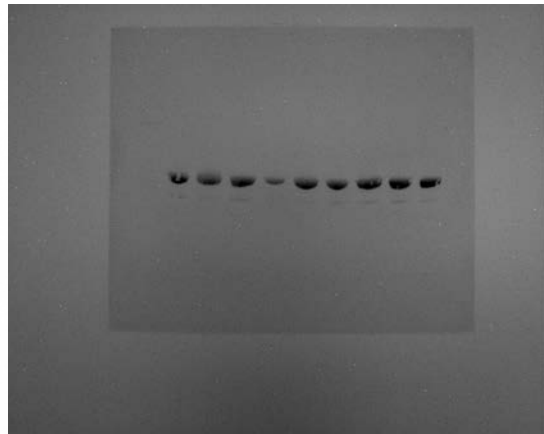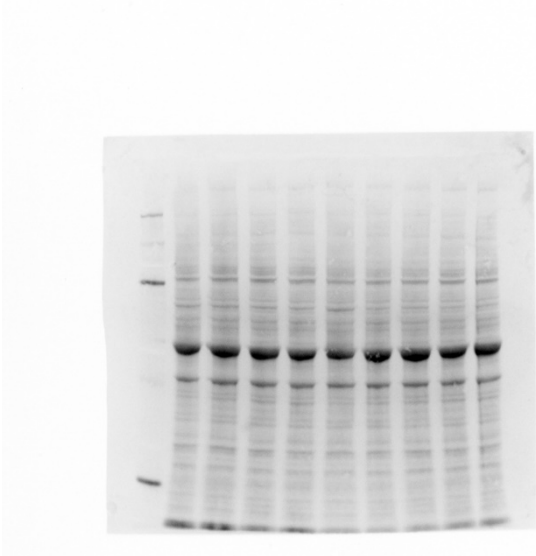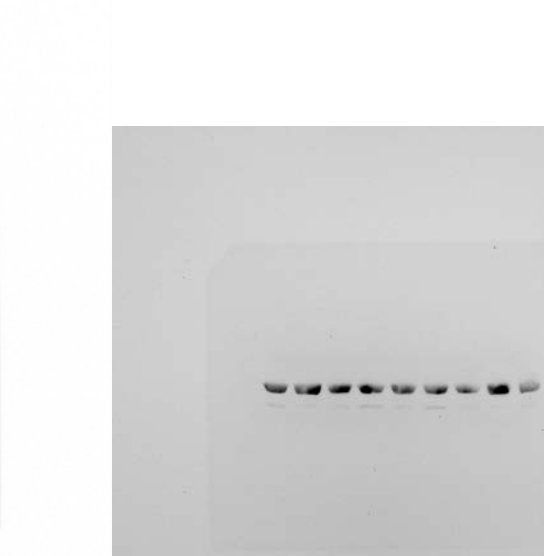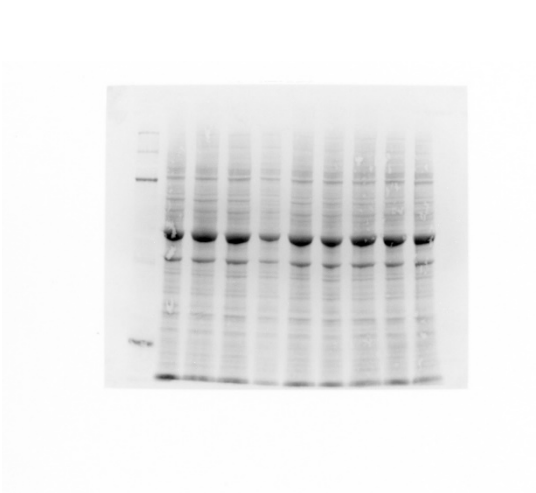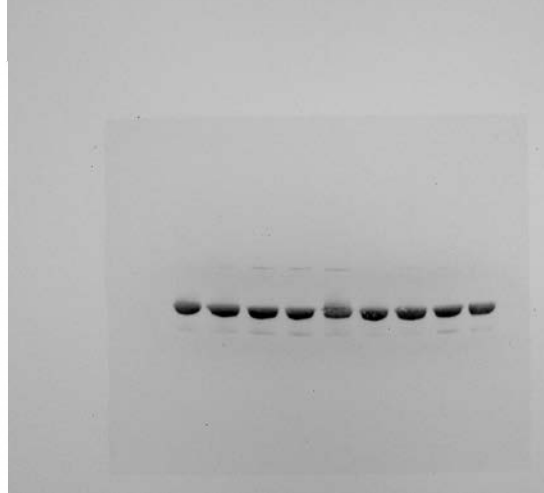

Supplement: pone.0257847.s001.pdf [file pone.0257847.s001.pdf]
